# Supplementary material for: The Tuberculosis Cascade of Care in India’s Public Sector: A Systematic Review and Meta-analysis
Source: PLOS journal article supplement (doi:10.1371/journal.pmed.1002149), 2016-10-25
Supplement: S1 (10.1371/journal.pmed.1002149.s001) [file journal.pmed.1002149.s001]

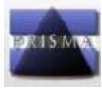

# S1 Text: PRISMA 2009 Checklist for the systematic reviews included in the manuscript “The Tuberculosis Cascade of Care in India’s Public Sector: A Systematic Review and Meta-Analysis”

| Section/topic       | # | Checklist item                                                                                                                                                                                                                                                                                              | Care-seeking systematic review (S2 Text)<br><br>Reported on page #                  | Failure to complete the diagnostic workup and pretreatment loss to follow-up (S3 Text)<br><br>Reported on page # | Tuberculosis recurrence (S4 Text)<br><br>Reported on page #                         |
|---------------------|---|-------------------------------------------------------------------------------------------------------------------------------------------------------------------------------------------------------------------------------------------------------------------------------------------------------------|-------------------------------------------------------------------------------------|------------------------------------------------------------------------------------------------------------------|-------------------------------------------------------------------------------------|
| <b>TITLE</b>        |   |                                                                                                                                                                                                                                                                                                             |                                                                                     |                                                                                                                  |                                                                                     |
| Title               | 1 | Identify the report as a systematic review, meta-analysis, or both.                                                                                                                                                                                                                                         | Main manuscript title, S2 Text title                                                | Main manuscript title, S3 Text title                                                                             | Main manuscript title, S4 Text title                                                |
| <b>ABSTRACT</b>     |   |                                                                                                                                                                                                                                                                                                             |                                                                                     |                                                                                                                  |                                                                                     |
| Structured summary  | 2 | Provide a structured summary including, as applicable: background; objectives; data sources; study eligibility criteria, participants, and interventions; study appraisal and synthesis methods; results; limitations; conclusions and implications of key findings; systematic review registration number. | Main manuscript abstract                                                            | Main manuscript abstract                                                                                         | Main manuscript abstract                                                            |
| <b>INTRODUCTION</b> |   |                                                                                                                                                                                                                                                                                                             |                                                                                     |                                                                                                                  |                                                                                     |
| Rationale           | 3 | Describe the rationale for the review in the context of what is already known.                                                                                                                                                                                                                              | Main manuscript “Introduction” section paragraphs 1-5; S2 Text “Objectives” section | Main manuscript “Introduction” section paragraphs 1-5; S3 Text “Objectives” section                              | Main manuscript “Introduction” section paragraphs 1-5; S4 Text “Objectives” section |
| Objectives          | 4 | Provide an explicit statement of questions being addressed with reference to participants, interventions, comparisons, outcomes, and study design (PICOS).                                                                                                                                                  | Main manuscript “Methods” section                                                   | Main manuscript “Methods” section                                                                                | Main manuscript “Methods” section                                                   |

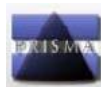

# S1 Text: PRISMA 2009 Checklist for the systematic reviews included in the manuscript “The Tuberculosis Cascade of Care in India’s Public Sector: A Systematic Review and Meta-Analysis”

|                           |   |                                                                                                                                                                                                        |                                                                                                             |                                                                                                             |                                                                                                             |
|---------------------------|---|--------------------------------------------------------------------------------------------------------------------------------------------------------------------------------------------------------|-------------------------------------------------------------------------------------------------------------|-------------------------------------------------------------------------------------------------------------|-------------------------------------------------------------------------------------------------------------|
|                           |   |                                                                                                                                                                                                        | paragraphs 1-13; S2 Text “Objectives” section                                                               | paragraphs 1-13; S3 Text “Objectives” section                                                               | paragraphs 1-13; S4 Text “Objectives” section                                                               |
| <b>METHODS</b>            |   |                                                                                                                                                                                                        |                                                                                                             |                                                                                                             |                                                                                                             |
| Protocol and registration | 5 | Indicate if a review protocol exists, if and where it can be accessed (e.g., Web address), and, if available, provide registration information including registration number.                          | Full details on the methodology of the review available in the manuscript supplementary text files          | Full details on the methodology of the review available in the manuscript supplementary text files          | Full details on the methodology of the review available in the manuscript supplementary text files          |
| Eligibility criteria      | 6 | Specify study characteristics (e.g., PICOS, length of follow-up) and report characteristics (e.g., years considered, language, publication status) used as criteria for eligibility, giving rationale. | S2 Text (Table C)                                                                                           | S3 Text (Tables F, G, H)                                                                                    | S4 Text (Table K)                                                                                           |
| Information sources       | 7 | Describe all information sources (e.g., databases with dates of coverage, contact with study authors to identify additional studies) in the search and date last searched.                             | Main manuscript pages “Data sources” subsection of the “Methods” section; S2 Text “Search strategy” section | Main manuscript pages “Data sources” subsection of the “Methods” section; S3 Text “Search strategy” section | Main manuscript pages “Data sources” subsection of the “Methods” section; S4 Text “Search strategy” section |
| Search                    | 8 | Present full electronic search strategy for at least one database, including any limits used, such that it could be repeated.                                                                          | S2 Text (Table A)                                                                                           | S3 Text (Table D)                                                                                           | S4 Text (Table I)                                                                                           |
| Study selection           | 9 | State the process for selecting studies (i.e., screening, eligibility, included in systematic review, and, if applicable, included in the meta-analysis).                                              | S2 Text “Inclusion and Exclusion criteria” and “Study                                                       | S3 Text “Inclusion and Exclusion criteria” and “Study                                                       | S4 Text “Inclusion and Exclusion criteria” and “Study                                                       |

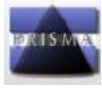

# S1 Text: PRISMA 2009 Checklist for the systematic reviews included in the manuscript “The Tuberculosis Cascade of Care in India’s Public Sector: A Systematic Review and Meta-Analysis”

|                                    |    |                                                                                                                                                                                                                        | selection”<br>sections                                     | selection”<br>sections                                        | selection”<br>sections                                      |
|------------------------------------|----|------------------------------------------------------------------------------------------------------------------------------------------------------------------------------------------------------------------------|------------------------------------------------------------|---------------------------------------------------------------|-------------------------------------------------------------|
| Data collection process            | 10 | Describe method of data extraction from reports (e.g., piloted forms, independently, in duplicate) and any processes for obtaining and confirming data from investigators.                                             | S2 Text “Data extraction and analysis” section             | S3 Text “Data extraction and analysis” section                | S4 Text “Data extraction and analysis” section              |
| Data items                         | 11 | List and define all variables for which data were sought (e.g., PICOS, funding sources) and any assumptions and simplifications made.                                                                                  | S2 Text “Data extraction and analysis” section and Table C | S3 Text “Data extraction and analysis” section and Tables F-H | S4 Text “Data extraction and analysis” section and Tables K |
| Risk of bias in individual studies | 12 | Describe methods used for assessing risk of bias of individual studies (including specification of whether this was done at the study or outcome level), and how this information is to be used in any data synthesis. | S2 Text “Quality assessment” section and Table B           | S3 Text “Quality assessment” section and Table E              | S4 Text “Quality assessment” section and Table J            |
| Summary measures                   | 13 | State the principal summary measures (e.g., risk ratio, difference in means).                                                                                                                                          | S2 Text “Objectives” section                               | S3 Text “Objectives” section                                  | S4 Text “Objectives” section                                |
| Synthesis of results               | 14 | Describe the methods of handling data and combining results of studies, if done, including measures of consistency (e.g., $I^2$ ) for each meta-analysis.                                                              | S2 Text “Data extraction and analysis”                     | S3 Text “Data extraction and analysis”                        | S4 Text “Data extraction and analysis”                      |

Page 1 of 2

| Section/topic | # | Checklist item | Care-seeking systematic review (S2 Text) | Failure to complete the diagnostic workup and pretreatment loss to follow-up (S3 Text) | Tuberculosis recurrence (S4 Text) |
|---------------|---|----------------|------------------------------------------|----------------------------------------------------------------------------------------|-----------------------------------|
|               |   |                | Reported on page #                       | Reported on page #                                                                     | Reported on page #                |



# S1 Text: PRISMA 2009 Checklist for the systematic reviews included in the manuscript “The Tuberculosis Cascade of Care in India’s Public Sector: A Systematic Review and Meta-Analysis”

|                             |    |                                                                                                                                                                 |                                                                                                                                                                                                                                                                                                                  |                                                                                                                                                                                                                                                                                                                                                                                                          |                                                                                                                                                                                                                                                                                 |
|-----------------------------|----|-----------------------------------------------------------------------------------------------------------------------------------------------------------------|------------------------------------------------------------------------------------------------------------------------------------------------------------------------------------------------------------------------------------------------------------------------------------------------------------------|----------------------------------------------------------------------------------------------------------------------------------------------------------------------------------------------------------------------------------------------------------------------------------------------------------------------------------------------------------------------------------------------------------|---------------------------------------------------------------------------------------------------------------------------------------------------------------------------------------------------------------------------------------------------------------------------------|
| Risk of bias across studies | 15 | Specify any assessment of risk of bias that may affect the cumulative evidence (e.g., publication bias, selective reporting within studies).                    | Note that there are no great instruments for evaluating risk of bias across these prevalence studies, but heterogeneity in these studies by region of India, etc. is described in the Main Manuscript “Results” section, subsection on “Chest symptomatics who do not get evaluated at TB diagnostic facilities” | Note that there are no great instruments for evaluating risk of bias across these prevalence studies, but heterogeneity in these studies by region of India, etc. is described in the Main Manuscript “Results” section, subsection on “TB patients evaluated at diagnostic facilities who are not successfully diagnosed” and subsection on “Pretreatment loss to follow-up of smear-positive patients” | Note that there are no great instruments for evaluating risk of bias across these prevalence studies, but heterogeneity in these studies by region of India, etc. is described in the Main Manuscript “Results” section, subsection on “Post-treatment TB recurrence and death” |
| Additional analyses         | 16 | Describe methods of additional analyses (e.g., sensitivity or subgroup analyses, meta-regression), if done, indicating which were pre-specified.                | Not applicable                                                                                                                                                                                                                                                                                                   | Not applicable                                                                                                                                                                                                                                                                                                                                                                                           | Not applicable                                                                                                                                                                                                                                                                  |
| <b>RESULTS</b>              |    |                                                                                                                                                                 |                                                                                                                                                                                                                                                                                                                  |                                                                                                                                                                                                                                                                                                                                                                                                          |                                                                                                                                                                                                                                                                                 |
| Study selection             | 17 | Give numbers of studies screened, assessed for eligibility, and included in the review, with reasons for exclusions at each stage, ideally with a flow diagram. | S2 Text (Fig A)                                                                                                                                                                                                                                                                                                  | S3 Text (Fig C)                                                                                                                                                                                                                                                                                                                                                                                          | S4 Text (Fig D)                                                                                                                                                                                                                                                                 |
| Study characteristics       | 18 | For each study, present characteristics for which data were extracted (e.g., study size, PICOS, follow-up period) and provide the citations.                    | S2 Text (Table C)                                                                                                                                                                                                                                                                                                | S3 Text (Tables F-H)                                                                                                                                                                                                                                                                                                                                                                                     | S4 Text (Table K)                                                                                                                                                                                                                                                               |

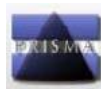

# S1 Text: PRISMA 2009 Checklist for the systematic reviews included in the manuscript “The Tuberculosis Cascade of Care in India’s Public Sector: A Systematic Review and Meta-Analysis”

|                               |    |                                                                                                                                                                                                          |                                                                                                                                        |                                                                                                                                                                                                                                |                                                                                                           |
|-------------------------------|----|----------------------------------------------------------------------------------------------------------------------------------------------------------------------------------------------------------|----------------------------------------------------------------------------------------------------------------------------------------|--------------------------------------------------------------------------------------------------------------------------------------------------------------------------------------------------------------------------------|-----------------------------------------------------------------------------------------------------------|
| Risk of bias within studies   | 19 | Present data on risk of bias of each study and, if available, any outcome level assessment (see item 12).                                                                                                | S2 Text (Table C)                                                                                                                      | S3 Text (Tables F-H)                                                                                                                                                                                                           | S4 Text (Table K)                                                                                         |
| Results of individual studies | 20 | For all outcomes considered (benefits or harms), present, for each study: (a) simple summary data for each intervention group (b) effect estimates and confidence intervals, ideally with a forest plot. | Main manuscript Fig 2-4                                                                                                                | Main manuscript Fig 5-6                                                                                                                                                                                                        | Main manuscript “Results” section, subsection on “Post-treatment TB recurrence and death”                 |
| Synthesis of results          | 21 | Present results of each meta-analysis done, including confidence intervals and measures of consistency.                                                                                                  | Main manuscript Fig 2-4 and “Results” section, subsection on “Chest symptomatics who do not get evaluated at TB diagnostic facilities” | Main manuscript Fig 5-6 and “Results” section, subsection on “TB patients evaluated at diagnostic facilities who are not successfully diagnosed” and subsection on “Pretreatment loss to follow-up of smear-positive patients” | Main manuscript “Results” section, subsection on “Post-treatment TB recurrence and death”                 |
| Risk of bias across studies   | 22 | Present results of any assessment of risk of bias across studies (see Item 15).                                                                                                                          | Note that there are no great instruments for evaluating risk of bias across these prevalence                                           | Note that there are no great instruments for evaluating risk of bias across these prevalence studies, but                                                                                                                      | Note that there are no great instruments for evaluating risk of bias across these prevalence studies, but |



# S1 Text: PRISMA 2009 Checklist for the systematic reviews included in the manuscript “The Tuberculosis Cascade of Care in India’s Public Sector: A Systematic Review and Meta-Analysis”

|                     |    |                                                                                                                                                                                      |                                                                                                                                                                                                                     |                                                                                                                                                                                                                                                                                                |                                                                                                                                                                       |
|---------------------|----|--------------------------------------------------------------------------------------------------------------------------------------------------------------------------------------|---------------------------------------------------------------------------------------------------------------------------------------------------------------------------------------------------------------------|------------------------------------------------------------------------------------------------------------------------------------------------------------------------------------------------------------------------------------------------------------------------------------------------|-----------------------------------------------------------------------------------------------------------------------------------------------------------------------|
|                     |    |                                                                                                                                                                                      | studies, but heterogeneity in these studies by region of India, etc. is described in the Main Manuscript “Results” section, subsection on “Chest symptomatics who do not get evaluated at TB diagnostic facilities” | heterogeneity in these studies by region of India, etc. is described in the Main Manuscript “Results” section, subsection on “TB patients evaluated at diagnostic facilities who are not successfully diagnosed” and subsection on “Pretreatment loss to follow-up of smear-positive patients” | heterogeneity in these studies by region of India, etc. is described in the Main Manuscript “Results” section, subsection on “Post-treatment TB recurrence and death” |
| Additional analysis | 23 | Give results of additional analyses, if done (e.g., sensitivity or subgroup analyses, meta-regression [see Item 16]).                                                                | Not applicable                                                                                                                                                                                                      | Not applicable                                                                                                                                                                                                                                                                                 | Not applicable                                                                                                                                                        |
| <b>DISCUSSION</b>   |    |                                                                                                                                                                                      |                                                                                                                                                                                                                     |                                                                                                                                                                                                                                                                                                |                                                                                                                                                                       |
| Summary of evidence | 24 | Summarize the main findings including the strength of evidence for each main outcome; consider their relevance to key groups (e.g., healthcare providers, users, and policy makers). | Main manuscript Fig 2-4 and “Results” section, subsection on “Chest symptomatics who do not get evaluated at TB diagnostic facilities” and the                                                                      | Main manuscript Fig 5-6 and “Results” section, subsection on “TB patients evaluated at diagnostic facilities who are not successfully diagnosed”                                                                                                                                               | Main manuscript “Results” section, subsection on “Post-treatment TB recurrence and death” and the                                                                     |

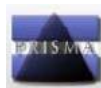

# S1 Text: PRISMA 2009 Checklist for the systematic reviews included in the manuscript “The Tuberculosis Cascade of Care in India’s Public Sector: A Systematic Review and Meta-Analysis”

|                |    |                                                                                                                                                               |                                                                                                                                                                                                  |                                                                                                                                                                                                                                                                                          |                                                                                                                                                     |
|----------------|----|---------------------------------------------------------------------------------------------------------------------------------------------------------------|--------------------------------------------------------------------------------------------------------------------------------------------------------------------------------------------------|------------------------------------------------------------------------------------------------------------------------------------------------------------------------------------------------------------------------------------------------------------------------------------------|-----------------------------------------------------------------------------------------------------------------------------------------------------|
|                |    |                                                                                                                                                               | “Discussion” section                                                                                                                                                                             | and subsection on “Pretreatment loss to follow-up of smear-positive patients” and the “Discussion” section                                                                                                                                                                               | “Discussion” section                                                                                                                                |
| Limitations    | 25 | Discuss limitations at study and outcome level (e.g., risk of bias), and at review-level (e.g., incomplete retrieval of identified research, reporting bias). | Main manuscript Fig 2-4 and “Results” section, subsection on “Chest symptomatics who do not get evaluated at TB diagnostic facilities” and the “Discussion” section, subsection on “Limitations” | Main manuscript Fig 5-6 and “Results” section, subsection on “TB patients evaluated at diagnostic facilities who are not successfully diagnosed” and subsection on “Pretreatment loss to follow-up of smear-positive patients” and the “Discussion” section, subsection on “Limitations” | Main manuscript “Results” section, subsection on “Post-treatment TB recurrence and death” and the “Discussion” section, subsection on “Limitations” |
| Conclusions    | 26 | Provide a general interpretation of the results in the context of other evidence, and implications for future research.                                       | Main manuscript “Discussion” section                                                                                                                                                             | Main manuscript “Discussion” section                                                                                                                                                                                                                                                     | Main manuscript “Discussion” section                                                                                                                |
| <b>FUNDING</b> |    |                                                                                                                                                               |                                                                                                                                                                                                  |                                                                                                                                                                                                                                                                                          |                                                                                                                                                     |



## S1 Text: PRISMA 2009 Checklist for the systematic reviews included in the manuscript “The Tuberculosis Cascade of Care in India’s Public Sector: A Systematic Review and Meta-Analysis”

|         |    |                                                                                                                                            |                                         |                                         |                                         |
|---------|----|--------------------------------------------------------------------------------------------------------------------------------------------|-----------------------------------------|-----------------------------------------|-----------------------------------------|
| Funding | 27 | Describe sources of funding for the systematic review and other support (e.g., supply of data); role of funders for the systematic review. | Main manuscript<br>“Funding”<br>section | Main manuscript<br>“Funding”<br>section | Main manuscript<br>“Funding”<br>section |
|---------|----|--------------------------------------------------------------------------------------------------------------------------------------------|-----------------------------------------|-----------------------------------------|-----------------------------------------|

From: Moher D, Liberati A, Tetzlaff J, Altman DG, The PRISMA Group (2009). Preferred Reporting Items for Systematic Reviews and Meta-Analyses: The PRISMA Statement. PLoS Med 6(6): e1000097. doi:10.1371/journal.pmed1000097

For more information, visit: [www.prisma-statement.org](http://www.prisma-statement.org).
